# Supplementary material for: Single-Cell Transcriptome Profiling Revealed That Vitrification of Somatic Cloned Porcine Blastocysts Causes Substantial Perturbations in Gene Expression
Source: Front Genet. 2020 Jul 24;11:640. doi: 10.3389/fgene.2020.00640 (PMC7394247; doi:10.3389/fgene.2020.00640)
Supplement: Supplementary Table 4 — Genes downregulated in vitrified porcine cloned blastocyst. [file Table_4.XLSX]

## Sheet: Sheet1
Supplementary Table 4.Genes downregulated in vitrified porcine cloned blastocyst
gene_id	gene_name	transcript_id	GO	KEGG	KO_ENTRY	EC	Description	FPKM.SCNT_VT1	FPKM.SCNT_VT2	FPKM.SCNT_VT3	FPKM.SCNT_CNT1	FPKM.SCNT_CNT2	FPKM.SCNT_CNT3	fc	log2(fc)	pval	qval	regulation	significant
ENSSSCG00000006160	STMN2	ENSSSCT00000006754	GO:1990090(cellular response to nerve growth factor stimulus);GO:0051493(regulation of cytoskeleton organization);GO:0048471(perinuclear region of cytoplasm);GO:0048306(calcium-dependent protein binding);GO:0043025(neuronal cell body);GO:0043005(neuron projection);GO:0031175(neuron projection development);GO:0031117(positive regulation of microtubule depolymerization);GO:0031115(negative regulati…	NA	NA	NA	stathmin 2 [Source:NCBI gene;Acc:100156768]	6.77975	2.07333	5.08468	31.3638	77.9516	111.746	0.0630492	-3.98738	1.91313e-12	1.01645e-08	down	yes
ENSSSCG00000012709		ENSSSCT00000013895;ENSSSCT00000035277	NA	NA	NA	NA		0	0	0	0.796654	18.2734	11.2026	-inf	-inf	3.48448e-11	9.25652e-08	down	yes
ENSSSCG00000034054		ENSSSCT00000063996	GO:0006406(mRNA export from nucleus);GO:0005737(cytoplasm);GO:0005634(nucleus);GO:0003729(mRNA binding);GO:0003723(RNA binding);GO:0003676(nucleic acid binding)	03008(Ribosome biogenesis in eukaryotes);03013(RNA transport);03015(mRNA surveillance pathway);05164(Influenza A);05168(Herpes simplex infection)	K14284	NA	nuclear RNA export factor 3-like [Source:NCBI gene;Acc:102164431]	0	0	0	3.71011	6.64064	2.0353	-inf	-inf	1.52009e-10	3.23049e-07	down	yes
ENSSSCG00000038521	CHAC1	ENSSSCT00000038822	GO:0022008(neurogenesis);GO:0016829(lyase activity);GO:0006751(glutathione catabolic process);GO:0005802(trans-Golgi network);GO:0005112(Notch binding);GO:0003839(gamma-glutamylcyclotransferase activity)	NA	NA	NA	ChaC glutathione specific gamma-glutamylcyclotransferase 1 [Source:NCBI gene;Acc:100524723]	0.802415	1.97983	2.32517	19.3285	15.4516	16.3235	0.0999424	-3.32276	2.68539e-10	4.75582e-07	down	yes
ENSSSCG00000000867		ENSSSCT00000042652;ENSSSCT00000000947	GO:0043565(sequence-specific DNA binding);GO:0030154(cell differentiation);GO:0006357(regulation of transcription by RNA polymerase II);GO:0006355(regulation of transcription, DNA-templated);GO:0005634(nucleus);GO:0003700(DNA-binding transcription factor activity);GO:0003677(DNA binding);GO:0000981(DNA-binding transcription factor activity, RNA polymerase II-specific);GO:0000981(DNA-binding trans…	NA	NA	NA	Spi-C transcription factor [Source:NCBI gene;Acc:102164462]	0	0	0	34.5317	0.452019	0.0976	-inf	-inf	9.12898e-09	1.38578e-05	down	yes
ENSSSCG00000026976		ENSSSCT00000024111	GO:0016973(poly(A)+ mRNA export from nucleus);GO:0006406(mRNA export from nucleus);GO:0005737(cytoplasm);GO:0005634(nucleus);GO:0003729(mRNA binding);GO:0003723(RNA binding);GO:0003676(nucleic acid binding)	NA	NA	NA	nuclear RNA export factor 3-like [Source:NCBI gene;Acc:110257686]	0	0	0	0.543242	2.097	5.57709	-inf	-inf	4.17527e-07	0.00049296	down	yes
ENSSSCG00000012493	TAF7L	ENSSSCT00000013660	GO:1903508(positive regulation of nucleic acid-templated transcription);GO:0051123(RNA polymerase II preinitiation complex assembly);GO:0044212(transcription regulatory region DNA binding);GO:0035035(histone acetyltransferase binding);GO:0008134(transcription factor binding);GO:0006367(transcription initiation from RNA polymerase II promoter);GO:0006357(regulation of transcription by RNA polymera…	03022(Basal transcription factors)	K03132	NA	TATA-box binding protein associated factor 7 like [Source:NCBI gene;Acc:100517257]	0	0.077322	0.029252	1.36962	11.3791	1.66734	0.0073927	-7.07968	6.49736e-07	0.000629017	down	yes
ENSSSCG00000013618	EPOR	ENSSSCT00000014873	GO:0046697(decidualization);GO:0042802(identical protein binding);GO:0038162(erythropoietin-mediated signaling pathway);GO:0019221(cytokine-mediated signaling pathway);GO:0016021(integral component of membrane);GO:0016020(membrane);GO:0007507(heart development);GO:0007420(brain development);GO:0007165(signal transduction);GO:0004900(erythropoietin receptor activity);GO:0004896(cytokine receptor a…	04060(Cytokine-cytokine receptor interaction);04151(PI3K-Akt signaling pathway);04630(Jak-STAT signaling pathway);04640(Hematopoietic cell lineage)	K05079	NA	erythropoietin receptor [Source:NCBI gene;Acc:397554]	0.574464	0.343774	0.645348	3.56166	6.61674	4.96164	0.103275	-3.27544	6.51156e-07	0.000629017	down	yes
ENSSSCG00000030229	ABHD14A	ENSSSCT00000040942;ENSSSCT00000026406	GO:0016021(integral component of membrane);GO:0016020(membrane);GO:0005737(cytoplasm);GO:0005737(cytoplasm)	NA	NA	NA	abhydrolase domain containing 14A [Source:NCBI gene;Acc:100625665]	0	0	0	0.931403	0.856929	1.45419	-inf	-inf	8.72966e-07	0.00072325	down	yes
ENSSSCG00000022758	PECR	ENSSSCT00000028863	GO:0055114(oxidation-reduction process);GO:0033306(phytol metabolic process);GO:0019166(trans-2-enoyl-CoA reductase (NADPH) activity);GO:0005777(peroxisome);GO:0005739(mitochondrion);GO:0005102(signaling receptor binding)	01040(Biosynthesis of unsaturated fatty acids);01212(Fatty acid metabolism);04146(Peroxisome)	K07753	EC:1.3.1.38	peroxisomal trans-2-enoyl-CoA reductase [Source:NCBI gene;Acc:100312978]	2.13993	0.930876	0.958144	4.55532	23.4544	7.98201	0.111941	-3.15919	8.84834e-07	0.00072325	down	yes
ENSSSCG00000040566		ENSSSCT00000041843	NA	NA	NA	NA		5.25268	3.63264	5.10954	10.829	20.3595	26.1548	0.244054	-2.03473	4.22746e-06	0.00299473	down	yes
ENSSSCG00000022649	SLC7A11	ENSSSCT00000038168	GO:2000211(regulation of glutamate metabolic process);GO:1904717(regulation of AMPA glutamate receptor clustering);GO:1903786(regulation of glutathione biosynthetic process);GO:1903204(negative regulation of oxidative stress-induced neuron death);GO:1901494(regulation of cysteine metabolic process);GO:1900407(regulation of cellular response to oxidative stress);GO:0140206(dipeptide import across …	04216(Ferroptosis)	NA	NA	solute carrier family 7 member 11 [Source:NCBI gene;Acc:100623148]	0.793332	1.41439	1.67085	4.52415	14.7126	6.48525	0.150788	-2.7294	6.1308e-06	0.00383211	down	yes
ENSSSCG00000023819		ENSSSCT00000022749	GO:0006334(nucleosome assembly);GO:0005634(nucleus)	NA	NA	NA	testis-specific Y-encoded protein 4-like [Source:NCBI gene;Acc:100625034]	0	0	0	0.901499	2.28755	4.56476	-inf	-inf	7.64214e-06	0.00451141	down	yes
ENSSSCG00000008631	PQLC3	ENSSSCT00000009443	GO:0016021(integral component of membrane);GO:0016020(membrane)	NA	NA	NA	PQ loop repeat containing 3 [Source:NCBI gene;Acc:100525694]	81.4325	35.7279	38.6103	204.822	96.6199	350.068	0.239092	-2.06436	1.55083e-05	0.00704117	down	yes
ENSSSCG00000031579	PCP4L1	ENSSSCT00000041072	NA	NA	NA	NA	Purkinje cell protein 4 like 1 [Source:NCBI gene;Acc:100523600]	0	0	0	7.25847	1.01316	0.060306	-inf	-inf	1.56282e-05	0.00704117	down	yes
ENSSSCG00000034260	GDF15	ENSSSCT00000043610	GO:1901741(positive regulation of myoblast fusion);GO:0060400(negative regulation of growth hormone receptor signaling pathway);GO:0060395(SMAD protein signal transduction);GO:0051897(positive regulation of protein kinase B signaling);GO:0043410(positive regulation of MAPK cascade);GO:0042803(protein homodimerization activity);GO:0040015(negative regulation of multicellular organism growth);GO:00…	NA	NA	NA	growth differentiation factor 15 [Source:NCBI gene;Acc:100379630]	1.56129	1.14041	0.752171	7.28879	6.02901	15.0557	0.121729	-3.03826	1.98436e-05	0.00843432	down	yes
ENSSSCG00000033119		ENSSSCT00000038418	NA	NA	NA	NA		0	0	0	0.480458	13.6262	4.51469	-inf	-inf	2.65147e-05	0.00990502	down	yes
ENSSSCG00000035922		ENSSSCT00000026058	GO:0055114(oxidation-reduction process);GO:0020037(heme binding);GO:0016712(oxidoreductase activity, acting on paired donors, with incorporation or reduction of molecular oxygen, reduced flavin or flavoprotein as one donor, and incorporation of one atom of oxygen);GO:0016705(oxidoreductase activity, acting on paired donors, with incorporation or reduction of molecular oxygen);GO:0016021(integral …	NA	NA	NA		0.758334	1.40873	0.793083	2.69934	12.4612	48.3583	0.0466026	-4.42345	2.88299e-05	0.00990502	down	yes
ENSSSCG00000016983	STC2	ENSSSCT00000018493	GO:2001256(regulation of store-operated calcium entry);GO:0055074(calcium ion homeostasis);GO:0048471(perinuclear region of cytoplasm);GO:0046885(regulation of hormone biosynthetic process);GO:0042803(protein homodimerization activity);GO:0040015(negative regulation of multicellular organism growth);GO:0034976(response to endoplasmic reticulum stress);GO:0030968(endoplasmic reticulum unfolded pro…	NA	NA	NA	stanniocalcin 2 [Source:NCBI gene;Acc:100126236]	0.561666	0.887363	0.759483	7.65892	2.6117	3.77273	0.157264	-2.66874	2.88966e-05	0.00990502	down	yes
ENSSSCG00000038547	GABRB3	ENSSSCT00000063711	GO:1902711(GABA-A receptor complex);GO:1902476(chloride transmembrane transport);GO:1901215(negative regulation of neuron death);GO:0098794(postsynapse);GO:0090102(cochlea development);GO:0071420(cellular response to histamine);GO:0060384(innervation);GO:0060119(inner ear receptor cell development);GO:0060080(inhibitory postsynaptic potential);GO:0060021(roof of mouth development);GO:0050877(nerv…	04080(Neuroactive ligand-receptor interaction);04723(Retrograde endocannabinoid signaling);04726(Serotonergic synapse);04727(GABAergic synapse);05032(Morphine addiction);05033(Nicotine addiction)	NA	NA	gamma-aminobutyric acid type A receptor beta3 subunit [Source:NCBI gene;Acc:100625548]	0.0836646	0	0	0.370077	1.13057	7.2262	0.00958704	-6.7047	3.09451e-05	0.0102757	down	yes
ENSSSCG00000010734		ENSSSCT00000011746;ENSSSCT00000053167;ENSSSCT00000062009	GO:0055129(L-proline biosynthetic process);GO:0030170(pyridoxal phosphate binding);GO:0019544(arginine catabolic process to glutamate);GO:0016740(transferase activity);GO:0010121(arginine catabolic process to proline via ornithine);GO:0008483(transaminase activity);GO:0005737(cytoplasm);GO:0004587(ornithine-oxo-acid transaminase activity);GO:0003824(catalytic activity);GO:0003824(catalytic activi…	00330(Arginine and proline metabolism);00330(Arginine and proline metabolism)	K00819	EC:2.6.1.13	ornithine aminotransferase [Source:NCBI gene;Acc:100156865]	10.9151	4.1489	10.9048	75.829	163.044	7.3711	0.10546	-3.24524	3.22146e-05	0.0103731	down	yes
ENSSSCG00000031556	TCEAL7	ENSSSCT00000044628	GO:0045892(negative regulation of transcription, DNA-templated);GO:0032088(negative regulation of NF-kappaB transcription factor activity);GO:0005634(nucleus)	NA	NA	NA	transcription elongation factor A like 7 [Source:NCBI gene;Acc:100524125]	0	0	0	0.815698	0.580066	4.49439	-inf	-inf	3.6227e-05	0.0113104	down	yes
ENSSSCG00000002131	RNASE12	ENSSSCT00000002384	GO:0090501(RNA phosphodiester bond hydrolysis);GO:0016021(integral component of membrane);GO:0016020(membrane);GO:0004540(ribonuclease activity);GO:0003676(nucleic acid binding)	NA	NA	NA	ribonuclease A family member 12 (inactive) [Source:NCBI gene;Acc:100153086]	21.3489	17.2839	32.6035	240.434	40.973	112.639	0.180782	-2.46768	3.72542e-05	0.0113104	down	yes
ENSSSCG00000032722	GLRB	ENSSSCT00000041507	GO:1902476(chloride transmembrane transport);GO:0098982(GABA-ergic synapse);GO:0097112(gamma-aminobutyric acid receptor clustering);GO:0060079(excitatory postsynaptic potential);GO:0060078(regulation of postsynaptic membrane potential);GO:0060013(righting reflex);GO:0060012(synaptic transmission, glycinergic);GO:0050905(neuromuscular process);GO:0045211(postsynaptic membrane);GO:0042391(regulatio…	04080(Neuroactive ligand-receptor interaction)	K05196	NA	glycine receptor beta [Source:NCBI gene;Acc:414284]	0.030043	0.012354	0	0.32212	0.190495	2.7278	0.0130838	-6.25607	4.12622e-05	0.0121792	down	yes
ENSSSCG00000011450	ITIH1	ENSSSCT00000012530;ENSSSCT00000040540	GO:0030212(hyaluronan metabolic process);GO:0010951(negative regulation of endopeptidase activity);GO:0005515(protein binding);GO:0004867(serine-type endopeptidase inhibitor activity);GO:0004867(serine-type endopeptidase inhibitor activity)	NA	NA	NA	inter-alpha-trypsin inhibitor heavy chain 1 [Source:NCBI gene;Acc:396963]	0	0	0	0.053337	0.282076	0.209551	-inf	-inf	4.89338e-05	0.0134004	down	yes
ENSSSCG00000006578	S100A4	ENSSSCT00000007206;ENSSSCT00000033355	GO:0050786(RAGE receptor binding);GO:0048471(perinuclear region of cytoplasm);GO:0046914(transition metal ion binding);GO:0046872(metal ion binding);GO:0043123(positive regulation of I-kappaB kinase/NF-kappaB signaling);GO:0042802(identical protein binding);GO:0005634(nucleus);GO:0005509(calcium ion binding);GO:0005509(calcium ion binding)	NA	NA	NA	S100 calcium binding protein A4 [Source:NCBI gene;Acc:100156358]	0	0	0.187703	25.468	4.42878	0.459756	0.00618329	-7.33741	5.54625e-05	0.013484	down	yes
ENSSSCG00000003140	FGF21	ENSSSCT00000003482	GO:0120162(positive regulation of cold-induced thermogenesis);GO:0090080(positive regulation of MAPKKK cascade by fibroblast growth factor receptor signaling pathway);GO:0070374(positive regulation of ERK1 and ERK2 cascade);GO:0046326(positive regulation of glucose import);GO:0010469(regulation of signaling receptor activity);GO:0008543(fibroblast growth factor receptor signaling pathway);GO:0008…	04010(MAPK signaling pathway);04014(Ras signaling pathway);04015(Rap1 signaling pathway);04151(PI3K-Akt signaling pathway);04810(Regulation of actin cytoskeleton);05200(Pathways in cancer);05218(Melanoma);05224(Breast cancer)	K04358	NA	fibroblast growth factor 21 [Source:NCBI gene;Acc:100302504]	0	0	0	0.524601	2.1242	3.68127	-inf	-inf	5.58344e-05	0.013484	down	yes
ENSSSCG00000039909	ICAM2	ENSSSCT00000018812;ENSSSCT00000047754	GO:0098609(cell-cell adhesion);GO:0032154(cleavage furrow);GO:0016021(integral component of membrane);GO:0016020(membrane);GO:0007155(cell adhesion);GO:0005887(integral component of plasma membrane);GO:0005178(integrin binding);GO:0005178(integrin binding)	04514(Cell adhesion molecules (CAMs));04650(Natural killer cell mediated cytotoxicity);04650(Natural killer cell mediated cytotoxicity)	K06523	NA	intercellular adhesion molecule 2 [Source:NCBI gene;Acc:414387]	0	0	0	0.195336	0.149979	0.197106	-inf	-inf	5.89555e-05	0.0139214	down	yes
ENSSSCG00000016719	STK31	ENSSSCT00000018200	GO:0090305(nucleic acid phosphodiester bond hydrolysis);GO:0006468(protein phosphorylation);GO:0006401(RNA catabolic process);GO:0005737(cytoplasm);GO:0005634(nucleus);GO:0005524(ATP binding);GO:0004672(protein kinase activity);GO:0004518(nuclease activity);GO:0003723(RNA binding);GO:0001669(acrosomal vesicle)	NA	NA	NA	serine/threonine kinase 31 [Source:NCBI gene;Acc:100524057]	1.21468	3.89592	5.54769	8.5465	28.8138	28.077	0.162878	-2.61814	7.555e-05	0.0166916	down	yes
ENSSSCG00000000248	KRT5	ENSSSCT00000058065;ENSSSCT00000045495;ENSSSCT00000043096;ENSSSCT00000049272;ENSSSCT00000000267	GO:0097110(scaffold protein binding);GO:0045095(keratin filament);GO:0005886(plasma membrane);GO:0005882(intermediate filament);GO:0005737(cytoplasm);GO:0005198(structural molecule activity);GO:0005198(structural molecule activity)	NA	NA	NA	keratin 6A [Source:NCBI gene;Acc:102164968]	0	0	0	0.549137	0.0056506	0.198267	-inf	-inf	7.69707e-05	0.0166916	down	yes
ENSSSCG00000033291	PIP4K2B	ENSSSCT00000058547	GO:2000786(positive regulation of autophagosome assembly);GO:0046854(phosphatidylinositol phosphorylation);GO:0046488(phosphatidylinositol metabolic process);GO:0042803(protein homodimerization activity);GO:0016740(transferase activity);GO:0016310(phosphorylation);GO:0016308(1-phosphatidylinositol-4-phosphate 5-kinase activity);GO:0016307(phosphatidylinositol phosphate kinase activity);GO:0016301…	00562(Inositol phosphate metabolism);04070(Phosphatidylinositol signaling system);04810(Regulation of actin cytoskeleton)	K00920	EC:2.7.1.149	phosphatidylinositol-5-phosphate 4-kinase type 2 beta [Source:NCBI gene;Acc:100623031]	0	0	0	0.316039	0.197098	0.2849	-inf	-inf	8.945e-05	0.0182788	down	yes
ENSSSCG00000016159	CPS1	ENSSSCT00000058996	GO:1903718(cellular response to ammonia);GO:0072341(modified amino acid binding);GO:0071320(cellular response to cAMP);GO:0070409(carbamoyl phosphate biosynthetic process);GO:0050667(homocysteine metabolic process);GO:0046872(metal ion binding);GO:0046209(nitric oxide metabolic process);GO:0042645(mitochondrial nucleoid);GO:0042311(vasodilation);GO:0032496(response to lipopolysaccharide);GO:00194…	00220(Arginine biosynthesis);00250(Alanine, aspartate and glutamate metabolism);00910(Nitrogen metabolism);01200(Carbon metabolism);01230(Biosynthesis of amino acids)	NA	NA	carbamoyl-phosphate synthase 1 [Source:NCBI gene;Acc:100157716]	0.00746559	0	0	0.176187	0.352148	1.39149	0.00388869	-8.0065	0.000114888	0.0216667	down	yes
ENSSSCG00000006153	FABP5	ENSSSCT00000006747;ENSSSCT00000054753	GO:0008289(lipid binding);GO:0008289(lipid binding)	03320(PPAR signaling pathway);03320(PPAR signaling pathway)	K08754	NA	fatty acid binding protein 5 [Source:NCBI gene;Acc:574074]	0.648492	0.84192	1.12823	7.04429	12.1035	2.63897	0.120194	-3.05656	0.000116224	0.0216667	down	yes
ENSSSCG00000037459	TCTA	ENSSSCT00000043143	GO:0072675(osteoclast fusion);GO:0045671(negative regulation of osteoclast differentiation);GO:0016021(integral component of membrane);GO:0016020(membrane)	NA	NA	NA	T cell leukemia translocation altered [Source:NCBI gene;Acc:110256231]	4.93615	1.91872	3.5793	9.60029	9.03293	24.5447	0.241655	-2.04898	0.000122562	0.022218	down	yes
ENSSSCG00000027678	CCDC175	ENSSSCT00000026485	NA	NA	NA	NA	coiled-coil domain containing 175 [Source:NCBI gene;Acc:100622158]	0	0	0	0.22376	0.53149	0.22077	-inf	-inf	0.000123364	0.022218	down	yes
ENSSSCG00000017277	PECAM1	ENSSSCT00000018809;ENSSSCT00000034511;ENSSSCT00000065844;ENSSSCT00000039415;ENSSSCT00000035177;ENSSSCT00000047597;ENSSSCT00000035158	GO:0098742(cell-cell adhesion via plasma-membrane adhesion molecules);GO:0090673(endothelial cell-matrix adhesion);GO:0072672(neutrophil extravasation);GO:0072011(glomerular endothelium development);GO:0071944(cell periphery);GO:0050904(diapedesis);GO:0045121(membrane raft);GO:0044291(cell-cell contact zone);GO:0043542(endothelial cell migration);GO:0042803(protein homodimerization activity);GO:0…	04514(Cell adhesion molecules (CAMs));04670(Leukocyte transendothelial migration);05144(Malaria);05418(Fluid shear stress and atherosclerosis);05418(Fluid shear stress and atherosclerosis)	K06471	NA	platelet and endothelial cell adhesion molecule 1 [Source:NCBI gene;Acc:396941]	0.0279319	0.0259873	0.00831192	1.91833	0.0653991	0.287455	0.0274004	-5.18966	0.000139851	0.0247677	down	yes
ENSSSCG00000032557	LDHB	ENSSSCT00000045127	NA	00010(Glycolysis / Gluconeogenesis);00270(Cysteine and methionine metabolism);00620(Pyruvate metabolism);00640(Propanoate metabolism);04922(Glucagon signaling pathway)	K00016	EC:1.1.1.27	lactate dehydrogenase B [Source:NCBI gene;Acc:100621540]	3.05067	5.63381	5.09383	75.9569	9.67127	14.1403	0.138103	-2.85618	0.000161369	0.0272175	down	yes
ENSSSCG00000008997	FGB	ENSSSCT00000030664	GO:2000352(negative regulation of endothelial cell apoptotic process);GO:1902042(negative regulation of extrinsic apoptotic signaling pathway via death domain receptors);GO:0090277(positive regulation of peptide hormone secretion);GO:0072378(blood coagulation, fibrin clot formation);GO:0070527(platelet aggregation);GO:0070374(positive regulation of ERK1 and ERK2 cascade);GO:0051592(response to ca…	04610(Complement and coagulation cascades);04611(Platelet activation)	K03904	NA	fibrinogen beta chain [Source:NCBI gene;Acc:100514354]	0	0	0	0.120998	0.290218	0.405593	-inf	-inf	0.000195371	0.0316491	down	yes
ENSSSCG00000001906	CYP1A1	ENSSSCT00000002135;ENSSSCT00000052395	GO:0101020(estrogen 16-alpha-hydroxylase activity);GO:0071407(cellular response to organic cyclic compound);GO:0070576(vitamin D 24-hydroxylase activity);GO:0070330(aromatase activity);GO:0055114(oxidation-reduction process);GO:0050665(hydrogen peroxide biosynthetic process);GO:0046872(metal ion binding);GO:0046483(heterocycle metabolic process);GO:0043231(intracellular membrane-bounded organelle…	00140(Steroid hormone biosynthesis);00380(Tryptophan metabolism);00830(Retinol metabolism);00980(Metabolism of xenobiotics by cytochrome P450);04913(Ovarian Steroidogenesis);05204(Chemical carcinogenesis);05204(Chemical carcinogenesis)	K07408	EC:1.14.14.1	cytochrome P450 1A1 [Source:NCBI gene;Acc:403103]	0.514183	0.514111	0.584671	0.950505	5.00043	3.65807	0.16786	-2.57467	0.000262472	0.0398433	down	yes
ENSSSCG00000009513	SLC15A1	ENSSSCT00000010430	GO:1902600(proton transmembrane transport);GO:0055085(transmembrane transport);GO:0035673(oligopeptide transmembrane transporter activity);GO:0035672(oligopeptide transmembrane transport);GO:0022857(transmembrane transporter activity);GO:0016021(integral component of membrane);GO:0016020(membrane);GO:0015333(peptide:proton symporter activity);GO:0006857(oligopeptide transport);GO:0005903(brush bo…	04974(Protein digestion and absorption)	K14206	NA	solute carrier family 15 member 1 [Source:NCBI gene;Acc:397624]	2.00359	0.968091	1.41209	5.5661	2.6953	16.5371	0.176776	-2.50001	0.000269418	0.0403217	down	yes
ENSSSCG00000036026	SRARP	ENSSSCT00000038901	GO:0033148(positive regulation of intracellular estrogen receptor signaling pathway);GO:0030331(estrogen receptor binding);GO:0005737(cytoplasm);GO:0005634(nucleus)	NA	NA	NA	steroid receptor associated and regulated protein [Source:NCBI gene;Acc:110261102]	0	0.104662	0	0.177975	4.07952	4.3021	0.0122274	-6.35373	0.000282673	0.0417178	down	yes
ENSSSCG00000002313	SLC10A1	ENSSSCT00000002575	GO:0016021(integral component of membrane);GO:0016020(membrane);GO:0015721(bile acid and bile salt transport);GO:0008508(bile acid:sodium symporter activity)	04976(Bile secretion)	K14341	NA	solute carrier family 10 member 1 [Source:NCBI gene;Acc:100153302]	0.465734	0.783129	0.355779	4.07202	0.338534	13.6522	0.088837	-3.4927	0.000302042	0.0439657	down	yes
ENSSSCG00000011851		ENSSSCT00000057619;ENSSSCT00000012963;ENSSSCT00000038856	GO:0048012(hepatocyte growth factor receptor signaling pathway);GO:0000187(activation of MAPK activity);GO:0000187(activation of MAPK activity)	NA	NA	NA	mucin 20, cell surface associated [Source:NCBI gene;Acc:100134954]	0.274281	0.303897	0.517758	0.649475	1.91392	5.45005	0.136762	-2.87026	0.000307026	0.0440873	down	yes
ENSSSCG00000001716	RCAN2	ENSSSCT00000061108;ENSSSCT00000001918	GO:0070884(regulation of calcineurin-NFAT signaling cascade);GO:0043666(regulation of phosphoprotein phosphatase activity);GO:0019722(calcium-mediated signaling);GO:0008597(calcium-dependent protein serine/threonine phosphatase regulator activity);GO:0005737(cytoplasm);GO:0003676(nucleic acid binding);GO:0003676(nucleic acid binding)	04919(Thyroid hormone signaling pathway);04919(Thyroid hormone signaling pathway)	K17903	NA	regulator of calcineurin 2 [Source:NCBI gene;Acc:100738282]	0	0	0	0.135345	0.314622	0.475425	1522.34	-inf	0.000380015	0.0531321	down	yes
ENSSSCG00000031799	TMEM139	ENSSSCT00000060000	GO:0016021(integral component of membrane);GO:0016020(membrane)	NA	NA	NA	transmembrane protein 139 [Source:NCBI gene;Acc:100521303]	0	0	0	0.081723	0.168056	0.202774	-inf	-inf	0.000467104	0.0620431	down	yes
ENSSSCG00000035204		ENSSSCT00000042814;ENSSSCT00000048026	NA	NA	NA	NA	protein pitchfork-like [Source:NCBI gene;Acc:100523736]	0	0	0	0.302328	0.485662	0.0506473	-inf	-inf	0.00047776	0.0621025	down	yes
ENSSSCG00000005266	TMC1	ENSSSCT00000005801	GO:1903169(regulation of calcium ion transmembrane transport);GO:0070588(calcium ion transmembrane transport);GO:0060117(auditory receptor cell development);GO:0060005(vestibular reflex);GO:0050910(detection of mechanical stimulus involved in sensory perception of sound);GO:0032426(stereocilium tip);GO:0016021(integral component of membrane);GO:0016020(membrane);GO:0009897(external side of plasma…	NA	NA	NA	transmembrane channel like 1 [Source:NCBI gene;Acc:100516949]	0	0	0	0.276024	0.110061	0.240624	-inf	-inf	0.000513373	0.0634314	down	yes
ENSSSCG00000039571		ENSSSCT00000037484	NA	NA	NA	NA		0	0	0	0.305679	5.78675	3.29236	-inf	-inf	0.000564918	0.066698	down	yes
ENSSSCG00000032996	SLC7A5	ENSSSCT00000065428	GO:1902475(L-alpha-amino acid transmembrane transport);GO:0055085(transmembrane transport);GO:0043231(intracellular membrane-bounded organelle);GO:0022857(transmembrane transporter activity);GO:0016021(integral component of membrane);GO:0016020(membrane);GO:0015807(L-amino acid transport);GO:0015179(L-amino acid transmembrane transporter activity);GO:0006865(amino acid transport);GO:0005886(plasm…	NA	NA	NA	solute carrier family 7 member 5 [Source:HGNC Symbol;Acc:HGNC:11063]	0.578083	1.53371	0.330202	3.31049	3.84444	5.79795	0.188529	-2.40714	0.000628454	0.071042	down	yes
ENSSSCG00000038598	ADRB2	ENSSSCT00000044104	GO:2000969(positive regulation of AMPA receptor activity);GO:1904646(cellular response to amyloid-beta);GO:1904504(positive regulation of lipophagy);GO:1901098(positive regulation of autophagosome maturation);GO:0120162(positive regulation of cold-induced thermogenesis);GO:0097746(regulation of blood vessel diameter);GO:0071902(positive regulation of protein serine/threonine kinase activity);GO:0…	04020(Calcium signaling pathway);04022(cGMP - PKG signaling pathway);04024(cAMP signaling pathway);04080(Neuroactive ligand-receptor interaction);04261(Adrenergic signaling in cardiomyocytes);04923(Regulation of lipolysis in adipocyte);04924(Renin secretion);04970(Salivary secretion)	K04142	NA	adrenoceptor beta 2 [Source:NCBI gene;Acc:397357]	0	0	0	0	1.52114	1.70262	-inf	-inf	0.000650654	0.0720192	down	yes
ENSSSCG00000003669	MFSD2A	ENSSSCT00000004065	GO:1990379(lipid transport across blood brain barrier);GO:0071702(organic substance transport);GO:0060856(establishment of blood-brain barrier);GO:0055085(transmembrane transport);GO:0051978(lysophospholipid transporter activity);GO:0051977(lysophospholipid transport);GO:0045056(transcytosis);GO:0021766(hippocampus development);GO:0016021(integral component of membrane);GO:0016020(membrane);GO:00…	NA	NA	NA	major facilitator superfamily domain containing 2A [Source:NCBI gene;Acc:100518612]	0	0	0	0.283056	0.042838	0.192718	-inf	-inf	0.000663918	0.0727298	down	yes
ENSSSCG00000039273		ENSSSCT00000060176	NA	NA	NA	NA		18.1259	5.25478	15.9555	36.3216	88.4836	53.8818	0.22014	-2.18351	0.000764901	0.0812784	down	yes
ENSSSCG00000033747		ENSSSCT00000049724	GO:0050911(detection of chemical stimulus involved in sensory perception of smell);GO:0050896(response to stimulus);GO:0016021(integral component of membrane);GO:0016020(membrane);GO:0007608(sensory perception of smell);GO:0007186(G protein-coupled receptor signaling pathway);GO:0007165(signal transduction);GO:0005886(plasma membrane);GO:0004984(olfactory receptor activity);GO:0004930(G protein-c…	NA	NA	NA	olfactory receptor 6C2-like [Source:NCBI gene;Acc:110260847]	0	0	0	0.105805	1.32528	1.73552	-inf	-inf	0.00082654	0.0851846	down	yes
ENSSSCG00000017493	ZPBP2	ENSSSCT00000019046;ENSSSCT00000025164	GO:0044297(cell body);GO:0007339(binding of sperm to zona pellucida);GO:0005576(extracellular region);GO:0002199(zona pellucida receptor complex);GO:0001675(acrosome assembly);GO:0001669(acrosomal vesicle);GO:0001669(acrosomal vesicle)	NA	NA	NA	zona pellucida binding protein 2 [Source:NCBI gene;Acc:100302699]	0	0	0	0	0.315541	1.19995	-inf	-inf	0.000862549	0.08729	down	yes
ENSSSCG00000040622	HIST3H2A	ENSSSCT00000062035	GO:0070914(UV-damage excision repair);GO:0046982(protein heterodimerization activity);GO:0006337(nucleosome disassembly);GO:0005694(chromosome);GO:0005634(nucleus);GO:0003677(DNA binding);GO:0000788(nuclear nucleosome);GO:0000786(nucleosome)	04217(Necroptosis);05034(Alcoholism);05322(Systemic lupus erythematosus)	K11251	NA	histone H2A type 3 [Source:NCBI gene;Acc:100621538]	0	0.015626	0	0	0.947882	4.46535	0.00288663	-8.4364	0.00088147	0.0883632	down	yes
ENSSSCG00000039778		ENSSSCT00000039932	GO:0005758(mitochondrial intermembrane space)	NA	NA	NA	PRELI domain containing protein 3B-like [Source:NCBI gene;Acc:100525472]	19.6439	8.76118	1.36562	32.4744	41.1196	52.2082	0.236647	-2.07919	0.00097674	0.0943094	down	yes
ENSSSCG00000022945	UCHL1	ENSSSCT00000024016	GO:1904115(axon cytoplasm);GO:0050905(neuromuscular process);GO:0048747(muscle fiber development);GO:0044306(neuron projection terminus);GO:0043407(negative regulation of MAP kinase activity);GO:0043209(myelin sheath);GO:0043130(ubiquitin binding);GO:0043025(neuronal cell body);GO:0042755(eating behavior);GO:0036459(thiol-dependent ubiquitinyl hydrolase activity);GO:0031694(alpha-2A adrenergic re…	05012(Parkinson's disease)	K05611	EC:3.4.19.12	ubiquitin C-terminal hydrolase L1 [Source:NCBI gene;Acc:396637]	4.65497	0	0.801154	1.6959	158.636	23.9765	0.0296032	-5.0781	0.000994157	0.0943207	down	yes
ENSSSCG00000038552		ENSSSCT00000065769	GO:0003723(RNA binding)	NA	NA	NA		0.844952	4.1784	2.96335	22.9884	1.55617	38.8168	0.12605	-2.98793	0.00104019	0.0954824	down	yes
ENSSSCG00000028282	SLC1A4	ENSSSCT00000029680	GO:1902476(chloride transmembrane transport);GO:0055085(transmembrane transport);GO:0050890(cognition);GO:0035524(proline transmembrane transport);GO:0034590(L-hydroxyproline transmembrane transporter activity);GO:0034589(hydroxyproline transport);GO:0016021(integral component of membrane);GO:0016020(membrane);GO:0015826(threonine transport);GO:0015825(L-serine transport);GO:0015824(proline trans…	NA	NA	NA	solute carrier family 1 member 4 [Source:NCBI gene;Acc:396600]	0.131229	0.372979	0.475525	2.66036	1.15436	2.61448	0.152388	-2.71418	0.0011718	0.105521	down	yes
ENSSSCG00000009144	ETNPPL	ENSSSCT00000010013	GO:0050459(ethanolamine-phosphate phospho-lyase activity);GO:0030170(pyridoxal phosphate binding);GO:0008483(transaminase activity);GO:0003824(catalytic activity)	00564(Glycerophospholipid metabolism)	K14286	EC:4.2.3.2	ethanolamine-phosphate phospho-lyase [Source:NCBI gene;Acc:100519324]	5.21267	1.05736	0.084811	10.0698	3.68315	61.8646	0.0840391	-3.5728	0.00118506	0.105819	down	yes
ENSSSCG00000035344	UBE2S	ENSSSCT00000048993	GO:1904668(positive regulation of ubiquitin protein ligase activity);GO:0085020(protein K6-linked ubiquitination);GO:0070979(protein K11-linked ubiquitination);GO:0070534(protein K63-linked ubiquitination);GO:0061631(ubiquitin conjugating enzyme activity);GO:0044314(protein K27-linked ubiquitination);GO:0035519(protein K29-linked ubiquitination);GO:0031145(anaphase-promoting complex-dependent cat…	04120(Ubiquitin mediated proteolysis)	K10583	EC:2.3.2.23	ubiquitin conjugating enzyme E2 S [Source:NCBI gene;Acc:110261061]	16.9867	26.5301	7.11378	9.92502	87.8033	163.889	0.193529	-2.36938	0.00124421	0.109265	down	yes
ENSSSCG00000003532	LUZP1	ENSSSCT00000003924	GO:0060840(artery development);GO:0021503(neural fold bending);GO:0005634(nucleus);GO:0003281(ventricular septum development)	NA	NA	NA	leucine zipper protein 1 [Source:NCBI gene;Acc:100620499]	1.37047	4.39157	3.43823	28.6524	1.57717	20.5781	0.18108	-2.4653	0.00132343	0.111746	down	yes
ENSSSCG00000016912	PLPP1	ENSSSCT00000057634;ENSSSCT00000018418;ENSSSCT00000042472	GO:0046839(phospholipid dephosphorylation);GO:0042577(lipid phosphatase activity);GO:0016791(phosphatase activity);GO:0016311(dephosphorylation);GO:0016021(integral component of membrane);GO:0016020(membrane);GO:0008195(phosphatidate phosphatase activity);GO:0006644(phospholipid metabolic process);GO:0006629(lipid metabolic process);GO:0006470(protein dephosphorylation);GO:0005887(integral compon…	00561(Glycerolipid metabolism);00564(Glycerophospholipid metabolism);00565(Ether lipid metabolism);00600(Sphingolipid metabolism);04072(Phospholipase D signaling pathway);04666(Fc gamma R-mediated phagocytosis);04975(Fat digestion and absorption);05231(Choline metabolism in cancer);05231(Choline metabolism in cancer)	K01080	EC:3.1.3.4	phospholipid phosphatase 1 [Source:NCBI gene;Acc:100515451]	0.854311	0.28994	0.462303	0.834302	5.4178	2.62597	0.180957	-2.46628	0.00151758	0.122165	down	yes
ENSSSCG00000004672	GATM	ENSSSCT00000005158	GO:0120162(positive regulation of cold-induced thermogenesis);GO:0016740(transferase activity);GO:0016020(membrane);GO:0015068(glycine amidinotransferase activity);GO:0015067(amidinotransferase activity);GO:0014889(muscle atrophy);GO:0007611(learning or memory);GO:0007275(multicellular organism development);GO:0006601(creatine biosynthetic process);GO:0006600(creatine metabolic process);GO:000575…	00260(Glycine, serine and threonine metabolism);00330(Arginine and proline metabolism)	K00613	EC:2.1.4.1	glycine amidinotransferase [Source:NCBI gene;Acc:100126844]	0	0	0.014124	0.246929	1.59111	0.019049	0.00760546	-7.03875	0.00158578	0.126696	down	yes
ENSSSCG00000015223	DDX25	ENSSSCT00000012145	GO:0033391(chromatoid body);GO:0007286(spermatid development);GO:0006417(regulation of translation);GO:0006406(mRNA export from nucleus);GO:0005737(cytoplasm);GO:0005634(nucleus);GO:0005524(ATP binding);GO:0004386(helicase activity);GO:0004004(ATP-dependent RNA helicase activity);GO:0003676(nucleic acid binding)	NA	NA	NA	DEAD-box helicase 25 [Source:NCBI gene;Acc:100523329]	0	0	0	0	0.398599	0.46873	-inf	-inf	0.00164377	0.130348	down	yes
ENSSSCG00000017086	SLC36A2	ENSSSCT00000018602	GO:1902600(proton transmembrane transport);GO:0035524(proline transmembrane transport);GO:0016021(integral component of membrane);GO:0016020(membrane);GO:0015824(proline transport);GO:0015816(glycine transport);GO:0015808(L-alanine transport);GO:0015193(L-proline transmembrane transporter activity);GO:0015187(glycine transmembrane transporter activity);GO:0015180(L-alanine transmembrane transport…	NA	NA	NA	solute carrier family 36 member 2 [Source:NCBI gene;Acc:100515104]	2.14673	1.30854	1.80231	19.2718	2.09701	8.58201	0.17554	-2.51012	0.00198307	0.147357	down	yes
ENSSSCG00000028996	ALDH1A1	ENSSSCT00000027607;ENSSSCT00000050861	GO:0055114(oxidation-reduction process);GO:0018479(benzaldehyde dehydrogenase (NAD+) activity);GO:0016620(oxidoreductase activity, acting on the aldehyde or oxo group of donors, NAD or NADP as acceptor);GO:0016491(oxidoreductase activity);GO:0005829(cytosol);GO:0004029(aldehyde dehydrogenase (NAD) activity);GO:0004029(aldehyde dehydrogenase (NAD) activity)	00830(Retinol metabolism);00830(Retinol metabolism)	K07249	EC:1.2.1.36	aldehyde dehydrogenase 1 family member A1 [Source:NCBI gene;Acc:100517137]	0	0	0	0	0.132625	0.437393	-inf	-inf	0.00200446	0.147913	down	yes
ENSSSCG00000010190	ACTA1	ENSSSCT00000050871;ENSSSCT00000043596;ENSSSCT00000054140	GO:0090131(mesenchyme migration);GO:0048741(skeletal muscle fiber development);GO:0044297(cell body);GO:0030240(skeletal muscle thin filament assembly);GO:0030175(filopodium);GO:0030027(lamellipodium);GO:0030017(sarcomere);GO:0015629(actin cytoskeleton);GO:0010628(positive regulation of gene expression);GO:0005884(actin filament);GO:0005865(striated muscle thin filament);GO:0005856(cytoskeleton);…	NA	NA	NA	actin, alpha 1, skeletal muscle [Source:NCBI gene;Acc:100154254]	0.0277272	0.967135	1.42542	1.81744	23.2673	3.05375	0.0860132	-3.5393	0.00203377	0.14904	down	yes
ENSSSCG00000002754	NQO1	ENSSSCT00000003051	GO:0055114(oxidation-reduction process);GO:0043086(negative regulation of catalytic activity);GO:0042802(identical protein binding);GO:0022900(electron transport chain);GO:0016491(oxidoreductase activity);GO:0009055(electron transfer activity);GO:0006979(response to oxidative stress);GO:0005829(cytosol);GO:0003955(NAD(P)H dehydrogenase (quinone) activity)	00130(Ubiquinone and other terpenoid-quinone biosynthesis);05418(Fluid shear stress and atherosclerosis)	K00355	EC:1.6.5.2	NAD(P)H quinone dehydrogenase 1 [Source:NCBI gene;Acc:100286873]	0.521622	0	0.271425	0.35555	18.7197	1.15509	0.0392009	-4.67297	0.00210157	0.152954	down	yes
ENSSSCG00000015627	ZPBP	ENSSSCT00000017021	GO:0007339(binding of sperm to zona pellucida);GO:0005576(extracellular region)	NA	NA	NA	zona pellucida binding protein [Source:NCBI gene;Acc:397194]	0	0	0	0	2.08087	1.10069	-inf	-inf	0.00219765	0.157785	down	yes
ENSSSCG00000039854		ENSSSCT00000046749;ENSSSCT00000043686;ENSSSCT00000061599;ENSSSCT00000059442	GO:0016021(integral component of membrane);GO:0016020(membrane);GO:0016020(membrane)	NA	NA	NA	transmembrane protein 56 [Source:NCBI gene;Acc:106507461]	0.750962	1.57572	0.376576	1.07459	4.00157	7.36098	0.217354	-2.20188	0.00225768	0.159934	down	yes
ENSSSCG00000038613		ENSSSCT00000016540	GO:0050911(detection of chemical stimulus involved in sensory perception of smell);GO:0050896(response to stimulus);GO:0016021(integral component of membrane);GO:0016020(membrane);GO:0007608(sensory perception of smell);GO:0007186(G protein-coupled receptor signaling pathway);GO:0007165(signal transduction);GO:0005886(plasma membrane);GO:0004984(olfactory receptor activity);GO:0004930(G protein-c…	04740(Olfactory transduction)	K04257	NA	olfactory receptor 148-like [Source:NCBI gene;Acc:100518982]	0.260081	0.083319	0	2.18006	4.13387	3.9993	0.0332971	-4.90846	0.00231406	0.162843	down	yes
ENSSSCG00000029456	SLC7A1	ENSSSCT00000010217	GO:1903826(arginine transmembrane transport);GO:0055085(transmembrane transport);GO:0032991(protein-containing complex);GO:0022857(transmembrane transporter activity);GO:0016021(integral component of membrane);GO:0016020(membrane);GO:0015809(arginine transport);GO:0015181(arginine transmembrane transporter activity);GO:0006865(amino acid transport)	05206(MicroRNAs in cancer)	NA	NA	solute carrier family 7 member 1 [Source:NCBI gene;Acc:503545]	0.244021	0.372385	0.069305	1.78844	1.3122	1.10187	0.163167	-2.61558	0.00235722	0.163711	down	yes
ENSSSCG00000035382		ENSSSCT00000016537	GO:0050911(detection of chemical stimulus involved in sensory perception of smell);GO:0050896(response to stimulus);GO:0016021(integral component of membrane);GO:0016020(membrane);GO:0007608(sensory perception of smell);GO:0007186(G protein-coupled receptor signaling pathway);GO:0007165(signal transduction);GO:0005886(plasma membrane);GO:0004984(olfactory receptor activity);GO:0004930(G protein-c…	04740(Olfactory transduction)	K04257	NA	olfactory receptor 148-like [Source:NCBI gene;Acc:100513942]	0.061236	0	0	0.615317	1.80666	2.42707	0.0126285	-6.30718	0.00285264	0.191849	down	yes
ENSSSCG00000013181	SERPING1	ENSSSCT00000051830;ENSSSCT00000033188	GO:0045916(negative regulation of complement activation);GO:0030193(regulation of blood coagulation);GO:0010951(negative regulation of endopeptidase activity);GO:0005615(extracellular space);GO:0004867(serine-type endopeptidase inhibitor activity);GO:0001869(negative regulation of complement activation, lectin pathway);GO:0001869(negative regulation of complement activation, lectin pathway)	04610(Complement and coagulation cascades);05133(Pertussis);05133(Pertussis)	NA	NA	serpin family G member 1 [Source:NCBI gene;Acc:100144304]	1.28289	0.121552	1.08212	1.01661	5.80591	8.73498	0.159831	-2.64538	0.00300609	0.199642	down	yes
ENSSSCG00000036893	PTHLH	ENSSSCT00000036745	GO:0061182(negative regulation of chondrocyte development);GO:0051428(peptide hormone receptor binding);GO:0032331(negative regulation of chondrocyte differentiation);GO:0030282(bone mineralization);GO:0010469(regulation of signaling receptor activity);GO:0010468(regulation of gene expression);GO:0007189(adenylate cyclase-activating G protein-coupled receptor signaling pathway);GO:0005829(cytosol…	NA	NA	NA	parathyroid hormone like hormone [Source:NCBI gene;Acc:396951]	0	0	0	0	0.238438	0.562246	-inf	-inf	0.00311933	0.20335	down	yes
ENSSSCG00000028214		ENSSSCT00000030002	NA	NA	NA	NA	melanoma-associated antigen B1-like [Source:NCBI gene;Acc:100154079]	0	0	0	0	1.85353	1.00848	-inf	-inf	0.00338893	0.215633	down	yes
ENSSSCG00000005503	TLR4	ENSSSCT00000006051	GO:1904646(cellular response to amyloid-beta);GO:1903974(positive regulation of cellular response to macrophage colony-stimulating factor stimulus);GO:1903428(positive regulation of reactive oxygen species biosynthetic process);GO:1903223(positive regulation of oxidative stress-induced neuron death);GO:1901224(positive regulation of NIK/NF-kappaB signaling);GO:1900227(positive regulation of NLRP3…	04064(NF-kappa B signaling pathway);04066(HIF-1 signaling pathway);04145(Phagosome);04151(PI3K-Akt signaling pathway);04217(Necroptosis);04620(Toll-like receptor signaling pathway);04621(NOD-like receptor signaling pathway);05132(Salmonella infection);05133(Pertussis);05134(Legionellosis);05140(Leishmaniasis);05142(Chagas disease (American trypanosomiasis));05144(Malaria);05145(Toxoplasmosis);051…	K10160	NA	toll like receptor 4 [Source:NCBI gene;Acc:399541]	0	0	0	0	0.226828	0.385849	-inf	-inf	0.00361189	0.224415	down	yes
ENSSSCG00000017439	KRT32	ENSSSCT00000018985	GO:0005882(intermediate filament);GO:0005198(structural molecule activity)	NA	NA	NA	keratin 32 [Source:NCBI gene;Acc:100514599]	1.90191	0.365784	0.75048	5.41847	2.24052	12.4158	0.150346	-2.73364	0.00449692	0.247587	down	yes
ENSSSCG00000038694	CCND2	ENSSSCT00000044116;ENSSSCT00000062210	GO:1900087(positive regulation of G1/S transition of mitotic cell cycle);GO:0097129(cyclin D2-CDK4 complex);GO:0071481(cellular response to X-ray);GO:0051726(regulation of cell cycle);GO:0051301(cell division);GO:0045787(positive regulation of cell cycle);GO:0019901(protein kinase binding);GO:0016538(cyclin-dependent protein serine/threonine kinase regulator activity);GO:0016020(membrane);GO:0008…	04068(FoxO signaling pathway);04110(Cell cycle);04115(p53 signaling pathway);04151(PI3K-Akt signaling pathway);04218(Cellular senescence);04310(Wnt signaling pathway);04340(Hedgehog signaling pathway);04390(Hippo signaling pathway);04510(Focal adhesion);04630(Jak-STAT signaling pathway);04917(Prolactin signaling pathway);05162(Measles);05165(Human papillomavirus infection);05166(HTLV-I infection)…	K10151	NA	cyclin D2 [Source:NCBI gene;Acc:397162]	0.07529	0.131959	0	0.133559	2.27553	1.07898	0.0594166	-4.07299	0.00454938	0.249184	down	yes
ENSSSCG00000003278		ENSSSCT00000031685;ENSSSCT00000003641	GO:0016021(integral component of membrane);GO:0016020(membrane);GO:0016020(membrane)	NA	NA	NA	leukocyte immunoglobulin-like receptor subfamily B member 3-like [Source:NCBI gene;Acc:100511639]	0	0	0	0.42614	0.574762	0	-inf	-inf	0.00482576	0.260297	down	yes
ENSSSCG00000033858		ENSSSCT00000044015;ENSSSCT00000060483	GO:0005525(GTP binding);GO:0005525(GTP binding)	NA	NA	NA	putative GTP-binding protein 6 [Source:NCBI gene;Acc:110257936]	0.019717	0.029634	0	0.570857	0.36527	0.303926	0.0397975	-4.65118	0.00567963	0.288721	down	yes
ENSSSCG00000040770	CA1	ENSSSCT00000040854	GO:0046872(metal ion binding);GO:0016836(hydro-lyase activity);GO:0008270(zinc ion binding);GO:0006730(one-carbon metabolic process);GO:0005737(cytoplasm);GO:0004089(carbonate dehydratase activity);GO:0004064(arylesterase activity)	00910(Nitrogen metabolism)	NA	NA	carbonic anhydrase 1 [Source:NCBI gene;Acc:100153915]	0.017798	0	0	0.173899	0.452443	0.303793	0.0191349	-5.70765	0.00584751	0.294482	down	yes
ENSSSCG00000013787	ADGRE3	ENSSSCT00000053142;ENSSSCT00000029894	GO:0016021(integral component of membrane);GO:0016020(membrane);GO:0007186(G protein-coupled receptor signaling pathway);GO:0007166(cell surface receptor signaling pathway);GO:0005509(calcium ion binding);GO:0004930(G protein-coupled receptor activity);GO:0004888(transmembrane signaling receptor activity);GO:0004888(transmembrane signaling receptor activity)	NA	NA	NA	adhesion G protein-coupled receptor E3 [Source:NCBI gene;Acc:100516246]	0	0.0416266	0.0866787	0.418519	3.8327	0.234099	0.0286056	-5.12756	0.00602234	0.299035	down	yes
ENSSSCG00000002937		ENSSSCT00000046937;ENSSSCT00000040852	GO:0046872(metal ion binding);GO:0006355(regulation of transcription, DNA-templated);GO:0003676(nucleic acid binding);GO:0001835(blastocyst hatching);GO:0001835(blastocyst hatching)	NA	NA	NA	zinc finger protein 420 [Source:NCBI gene;Acc:102164547]	0.105933	0	0.115613	0.186148	2.12521	1.00191	0.0668663	-3.90258	0.00606425	0.299715	down	yes
ENSSSCG00000029875	ZNF461	ENSSSCT00000040041;ENSSSCT00000063106;ENSSSCT00000065342	GO:0046872(metal ion binding);GO:0006355(regulation of transcription, DNA-templated);GO:0005634(nucleus);GO:0003676(nucleic acid binding);GO:0003676(nucleic acid binding)	NA	NA	NA	zinc finger protein 461 [Source:NCBI gene;Acc:106510528]	0.632228	0.11184	0.211793	0.718945	1.30258	2.28947	0.221726	-2.17315	0.00638141	0.306828	down	yes
ENSSSCG00000030921	APOA1	ENSSSCT00000037402;ENSSSCT00000034599	GO:1900026(positive regulation of substrate adhesion-dependent cell spreading);GO:0071813(lipoprotein particle binding);GO:0070653(high-density lipoprotein particle receptor binding);GO:0070508(cholesterol import);GO:0070328(triglyceride homeostasis);GO:0060761(negative regulation of response to cytokine stimulus);GO:0060354(negative regulation of cell adhesion molecule production);GO:0060228(pho…	03320(PPAR signaling pathway);04975(Fat digestion and absorption);04977(Vitamin digestion and absorption);05143(African trypanosomiasis);05143(African trypanosomiasis)	K08757	NA	apolipoprotein A1 [Source:NCBI gene;Acc:397691]	1.52004	0.826302	0	36.7275	0.509431	2.06538	0.0596998	-4.06613	0.00653027	0.311169	down	yes
ENSSSCG00000015334	PDK4	ENSSSCT00000016707	GO:2000811(negative regulation of anoikis);GO:0072593(reactive oxygen species metabolic process);GO:0071398(cellular response to fatty acid);GO:0046320(regulation of fatty acid oxidation);GO:0045124(regulation of bone resorption);GO:0042594(response to starvation);GO:0042593(glucose homeostasis);GO:0042304(regulation of fatty acid biosynthetic process);GO:0016310(phosphorylation);GO:0016301(kinas…	NA	NA	NA	pyruvate dehydrogenase kinase 4 [Source:NCBI gene;Acc:100286778]	0.908184	1.30168	0.089489	2.0033	5.10781	4.30957	0.201333	-2.31235	0.00712304	0.332366	down	yes
ENSSSCG00000002350	ELMSAN1	ENSSSCT00000002614	GO:0005654(nucleoplasm);GO:0005634(nucleus);GO:0003677(DNA binding);GO:0003676(nucleic acid binding)	NA	NA	NA	ELM2 and Myb/SANT domain containing 1 [Source:NCBI gene;Acc:100623005]	1.22076	1.0465	6.58599	22.4745	17.515	2.68256	0.207472	-2.26901	0.00742517	0.340086	down	yes
ENSSSCG00000012198	MAGEB3	ENSSSCT00000013343	NA	NA	NA	NA	MAGE family member B3 [Source:NCBI gene;Acc:102160138]	0.07262	0.074247	1.29563	0.188623	8.95455	13.8615	0.0627045	-3.99529	0.00757592	0.345501	down	yes
ENSSSCG00000031963	SAXO2	ENSSSCT00000040005	GO:0008017(microtubule binding)	NA	NA	NA	stabilizer of axonemal microtubules 2 [Source:NCBI gene;Acc:100513023]	0.273918	0.136188	0.118659	1.39284	1.17528	1.21551	0.139751	-2.83907	0.0077598	0.348052	down	yes
ENSSSCG00000003459	CELA2A	ENSSSCT00000003844	GO:0016787(hydrolase activity);GO:0008236(serine-type peptidase activity);GO:0008233(peptidase activity);GO:0006508(proteolysis);GO:0005615(extracellular space);GO:0005576(extracellular region);GO:0004252(serine-type endopeptidase activity)	04972(Pancreatic secretion);04974(Protein digestion and absorption)	K01346	EC:3.4.21.71	chymotrypsin-like elastase family, member 2A [Source:NCBI gene;Acc:397197]	0.246786	0	0	0	6.78998	8.40622	0.01624	-5.94431	0.00811187	0.358623	down	yes
ENSSSCG00000021041		ENSSSCT00000026786;ENSSSCT00000041317	GO:0044255(cellular lipid metabolic process);GO:0043605(cellular amide catabolic process);GO:0043604(amide biosynthetic process);GO:0016811(hydrolase activity, acting on carbon-nitrogen (but not peptide) bonds, in linear amides);GO:0016787(hydrolase activity);GO:0006807(nitrogen compound metabolic process);GO:0006520(cellular amino acid metabolic process);GO:0006520(cellular amino acid metabolic …	NA	NA	NA	peptidase M20 domain containing 1 [Source:NCBI gene;Acc:100627595]	0.741606	0.269634	0.0568945	1.49823	3.04588	2.9927	0.141722	-2.81886	0.00929683	0.385891	down	yes
ENSSSCG00000021866	EDDM3B	ENSSSCT00000031439;ENSSSCT00000057102	GO:0090305(nucleic acid phosphodiester bond hydrolysis);GO:0016787(hydrolase activity);GO:0004519(endonuclease activity);GO:0004518(nuclease activity);GO:0003676(nucleic acid binding);GO:0003676(nucleic acid binding)	NA	NA	NA	epididymal protein 3B [Source:NCBI gene;Acc:397204]	0.291806	0.194984	0	2.91943	0.0489525	8.43955	0.0426712	-4.55059	0.00937544	0.38764	down	yes
ENSSSCG00000030241	TSC22D3	ENSSSCT00000062457;ENSSSCT00000053454	GO:0070236(negative regulation of activation-induced cell death of T cells);GO:0006970(response to osmotic stress);GO:0006355(regulation of transcription, DNA-templated);GO:0005737(cytoplasm);GO:0005634(nucleus);GO:0003700(DNA-binding transcription factor activity);GO:0003700(DNA-binding transcription factor activity)	NA	NA	NA	TSC22 domain family member 3 [Source:NCBI gene;Acc:100517321]	0.462948	0.138494	0.0971121	1.34755	2.66885	1.07708	0.137147	-2.86621	0.00981415	0.400783	down	yes
ENSSSCG00000040920	PRKACB	ENSSSCT00000063519;ENSSSCT00000065913;ENSSSCT00000036759	GO:0045171(intercellular bridge);GO:0034237(protein kinase A regulatory subunit binding);GO:0031625(ubiquitin protein ligase binding);GO:0016740(transferase activity);GO:0016310(phosphorylation);GO:0016301(kinase activity);GO:0007186(G protein-coupled receptor signaling pathway);GO:0006468(protein phosphorylation);GO:0005829(cytosol);GO:0005813(centrosome);GO:0005524(ATP binding);GO:0004691(cAMP-…	01522(Endocrine resistance);04010(MAPK signaling pathway);04014(Ras signaling pathway);04020(Calcium signaling pathway);04024(cAMP signaling pathway);04062(Chemokine signaling pathway);04114(Oocyte meiosis);04140(Autophagy - animal);04211(Longevity regulating pathway - mammal);04213(Longevity regulating pathway - multiple species);04261(Adrenergic signaling in cardiomyocytes);04270(Vascular smoot…	NA	NA	protein kinase cAMP-activated catalytic subunit beta [Source:NCBI gene;Acc:100623628]	0.0148457	0	0	0.0538524	0.291035	0.259242	0.0245737	-5.34674	0.00999995	0.405571	down	yes
ENSSSCG00000033106	GTF2A1L	ENSSSCT00000059012	GO:0050890(cognition);GO:0006367(transcription initiation from RNA polymerase II promoter);GO:0005737(cytoplasm);GO:0005672(transcription factor TFIIA complex);GO:0005634(nucleus)	03022(Basal transcription factors);05203(Viral carcinogenesis)	K03122	NA	general transcription factor IIA subunit 1 like [Source:NCBI gene;Acc:100519953]	6.56641	15.1002	0.168859	62.6419	84.2568	2.93752	0.145729	-2.77864	0.0105591	0.42023	down	yes
ENSSSCG00000035297	ISG12(A)	ENSSSCT00000049988;ENSSSCT00000061351	GO:0016021(integral component of membrane);GO:0016020(membrane);GO:0005739(mitochondrion);GO:0005739(mitochondrion)	NA	NA	NA	putative ISG12(a) protein [Source:NCBI gene;Acc:100153902]	0.762945	0	0.04837	0.956854	3.11896	3.82576	0.102678	-3.28381	0.0107088	0.423188	down	yes
ENSSSCG00000023710	REEP1	ENSSSCT00000058685;ENSSSCT00000029906;ENSSSCT00000044678	GO:0016021(integral component of membrane);GO:0016020(membrane);GO:0016020(membrane)	NA	NA	NA	receptor accessory protein 1 [Source:NCBI gene;Acc:100522432]	0	0.0196595	0.0228567	0.158787	0.192343	0.523836	0.0485918	-4.36314	0.0107529	0.423188	down	yes
ENSSSCG00000040524	ISYNA1	ENSSSCT00000051346;ENSSSCT00000057176;ENSSSCT00000059009	GO:0008654(phospholipid biosynthetic process);GO:0006021(inositol biosynthetic process);GO:0004512(inositol-3-phosphate synthase activity);GO:0004512(inositol-3-phosphate synthase activity)	NA	NA	NA	inositol-3-phosphate synthase 1 [Source:HGNC Symbol;Acc:HGNC:29821]	0.046854	0.326519	0.240211	3.29014	0.345045	1.72211	0.114533	-3.12617	0.0110665	0.427611	down	yes
ENSSSCG00000040053	LSMEM1	ENSSSCT00000053161	GO:0016021(integral component of membrane);GO:0016020(membrane);GO:0005829(cytosol)	NA	NA	NA	leucine rich single-pass membrane protein 1 [Source:NCBI gene;Acc:100519992]	0.754878	0.142947	1.55543	1.06286	7.35553	4.31868	0.192608	-2.37626	0.0115888	0.438231	down	yes
ENSSSCG00000029771		ENSSSCT00000038846;ENSSSCT00000063417;ENSSSCT00000023372	GO:0016021(integral component of membrane);GO:0016020(membrane);GO:0007156(homophilic cell adhesion via plasma membrane adhesion molecules);GO:0007155(cell adhesion);GO:0005887(integral component of plasma membrane);GO:0005886(plasma membrane);GO:0005509(calcium ion binding);GO:0005509(calcium ion binding)	NA	NA	NA	protocadherin 11 X-linked [Source:NCBI gene;Acc:414736]	0.0388856	0	0	0.313601	0.533758	0.149963	0.03899	-4.68075	0.0118759	0.445914	down	yes
ENSSSCG00000003740	ZSCAN30	ENSSSCT00000004141;ENSSSCT00000059914	GO:0046872(metal ion binding);GO:0006355(regulation of transcription, DNA-templated);GO:0005634(nucleus);GO:0003700(DNA-binding transcription factor activity);GO:0003676(nucleic acid binding);GO:0003676(nucleic acid binding)	NA	NA	NA	zinc finger and SCAN domain containing 30 [Source:NCBI gene;Acc:100519372]	0.0524117	0	0	0.405617	0.603815	0.584138	0.0328895	-4.92623	0.0120485	0.446557	down	yes
ENSSSCG00000005106	NTRK3	ENSSSCT00000040145;ENSSSCT00000053046;ENSSSCT00000057030	GO:2000251(positive regulation of actin cytoskeleton reorganization);GO:1990090(cellular response to nerve growth factor stimulus);GO:0090630(activation of GTPase activity);GO:0070306(lens fiber cell differentiation);GO:0051965(positive regulation of synapse assembly);GO:0050927(positive regulation of positive chemotaxis);GO:0048691(positive regulation of axon extension involved in regeneration);…	04722(Neurotrophin signaling pathway);05230(Central carbon metabolism in cancer);05230(Central carbon metabolism in cancer)	K05101	EC:2.7.10.1	neurotrophic receptor tyrosine kinase 3 [Source:NCBI gene;Acc:397511]	0.12673	0	0.831006	0.885934	11.1799	0.587454	0.0756908	-3.72374	0.0123404	0.449698	down	yes
ENSSSCG00000033286		ENSSSCT00000060570	GO:0016791(phosphatase activity);GO:0016311(dephosphorylation)	NA	NA	NA		0.180017	0.763	0.060201	2.0672	1.69987	2.01242	0.173582	-2.52631	0.0123689	0.449698	down	yes
ENSSSCG00000031313		ENSSSCT00000027678	GO:0055114(oxidation-reduction process);GO:0046872(metal ion binding);GO:0042802(identical protein binding);GO:0008199(ferric iron binding);GO:0008198(ferrous iron binding);GO:0006880(intracellular sequestering of iron ion);GO:0006879(cellular iron ion homeostasis);GO:0006826(iron ion transport);GO:0005737(cytoplasm);GO:0005506(iron ion binding);GO:0004322(ferroxidase activity)	NA	NA	NA		0.069264	0	1.2003	2.93248	9.77814	8.7464	0.0591678	-4.07904	0.0144558	0.491124	down	yes
ENSSSCG00000017337	ACBD4	ENSSSCT00000040476;ENSSSCT00000037758	GO:0016021(integral component of membrane);GO:0016020(membrane);GO:0000062(fatty-acyl-CoA binding);GO:0000062(fatty-acyl-CoA binding)	NA	NA	NA	acyl-CoA binding domain containing 4 [Source:NCBI gene;Acc:100520929]	0.0929923	0.0357944	0.0210226	0.763165	0.788228	0.0349988	0.094434	-3.40455	0.0144831	0.491124	down	yes
ENSSSCG00000035493	SACS	ENSSSCT00000058730	GO:0090084(negative regulation of inclusion body assembly);GO:0070628(proteasome binding);GO:0051087(chaperone binding);GO:0030544(Hsp70 protein binding);GO:0005739(mitochondrion);GO:0005737(cytoplasm);GO:0005634(nucleus)	NA	NA	NA	sacsin molecular chaperone [Source:NCBI gene;Acc:100624042]	0.0129033	0.00821144	0.050423	0.0212327	1.13386	0.00334507	0.0617538	-4.01733	0.0152584	0.498532	down	yes
ENSSSCG00000034743		ENSSSCT00000048406;ENSSSCT00000043407	GO:0036064(ciliary basal body);GO:0032795(heterotrimeric G-protein binding);GO:0031683(G-protein beta/gamma-subunit complex binding);GO:0016021(integral component of membrane);GO:0016020(membrane);GO:0005814(centriole);GO:0005509(calcium ion binding);GO:0005509(calcium ion binding)	NA	NA	NA	centrin-4 [Source:NCBI gene;Acc:100622849]	0.38112	0.176421	0	1.43197	2.22642	3.35942	0.0794465	-3.65387	0.015808	0.500501	down	yes
ENSSSCG00000039758		ENSSSCT00000053005;ENSSSCT00000046185	NA	NA	NA	NA	nmrA-like family domain-containing protein 1 [Source:NCBI gene;Acc:110256379]	0.491515	0	0.0587352	0	22.4161	0.0268995	0.0245176	-5.35004	0.0159386	0.501076	down	yes
ENSSSCG00000031525	MARCH11	ENSSSCT00000046499	GO:0046872(metal ion binding);GO:0016021(integral component of membrane);GO:0016020(membrane);GO:0008270(zinc ion binding)	NA	NA	NA	membrane associated ring-CH-type finger 11 [Source:NCBI gene;Acc:100521230]	0	0.035626	0	0	2.25991	0.293019	0.013955	-6.16308	0.0168599	0.513334	down	yes
ENSSSCG00000004421	FYN	ENSSSCT00000034071;ENSSSCT00000004886	GO:1905664(regulation of calcium ion import across plasma membrane);GO:1904645(response to amyloid-beta);GO:1902951(negative regulation of dendritic spine maintenance);GO:1901216(positive regulation of neuron death);GO:1900449(regulation of glutamate receptor signaling pathway);GO:1900182(positive regulation of protein localization to nucleus);GO:0097718(disordered domain specific binding);GO:009…	04071(Sphingolipid signaling pathway);04072(Phospholipase D signaling pathway);04360(Axon guidance);04380(Osteoclast differentiation);04510(Focal adhesion);04520(Adherens junction);04611(Platelet activation);04650(Natural killer cell mediated cytotoxicity);04660(T cell receptor signaling pathway);04664(Fc epsilon RI signaling pathway);04725(Cholinergic synapse);05020(Prion diseases);05162(Measles…	NA	NA	FYN proto-oncogene, Src family tyrosine kinase [Source:NCBI gene;Acc:791125]	0.116304	0.0673435	0.143588	0.742191	1.08203	0.819032	0.1238	-3.01391	0.0172124	0.519598	down	yes
ENSSSCG00000010853	EPHX1	ENSSSCT00000011875	GO:0097176(epoxide metabolic process);GO:0033961(cis-stilbene-oxide hydrolase activity);GO:0019439(aromatic compound catabolic process);GO:0016787(hydrolase activity);GO:0016020(membrane);GO:0014070(response to organic cyclic compound);GO:0006725(cellular aromatic compound metabolic process);GO:0005789(endoplasmic reticulum membrane);GO:0005783(endoplasmic reticulum);GO:0004301(epoxide hydrolase …	00980(Metabolism of xenobiotics by cytochrome P450);04976(Bile secretion);05204(Chemical carcinogenesis)	K01253	EC:3.3.2.9	epoxide hydrolase 1 [Source:NCBI gene;Acc:397639]	4.20733	0	2.21918	3.8548	39.7961	7.85151	0.124781	-3.00253	0.0175554	0.522835	down	yes
ENSSSCG00000024517	AKAP6	ENSSSCT00000058475;ENSSSCT00000041802;ENSSSCT00000026181	GO:1902261(positive regulation of delayed rectifier potassium channel activity);GO:1901381(positive regulation of potassium ion transmembrane transport);GO:0071320(cellular response to cAMP);GO:0060306(regulation of membrane repolarization);GO:0051018(protein kinase A binding);GO:0048471(perinuclear region of cytoplasm);GO:0044325(ion channel binding);GO:0034704(calcium channel complex);GO:003196…	NA	NA	NA	A-kinase anchoring protein 6 [Source:NCBI gene;Acc:100155181]	0.00571763	0.00672938	0	0.0367496	0.097323	0.109422	0.0511183	-4.29002	0.0202508	0.554601	down	yes
ENSSSCG00000005243	PGM5	ENSSSCT00000005777	GO:0071704(organic substance metabolic process);GO:0046872(metal ion binding);GO:0043034(costamere);GO:0042383(sarcolemma);GO:0030239(myofibril assembly);GO:0030055(cell-substrate junction);GO:0030018(Z disc);GO:0016868(intramolecular transferase activity, phosphotransferases);GO:0016010(dystrophin-associated glycoprotein complex);GO:0014706(striated muscle tissue development);GO:0014704(intercal…	NA	NA	NA	phosphoglucomutase 5 [Source:NCBI gene;Acc:100511977]	0.602393	0.379124	0.115959	8.49504	0.289089	0.184419	0.122369	-3.03069	0.0204727	0.557801	down	yes
ENSSSCG00000039998	CLIC2	ENSSSCT00000037321	GO:1902476(chloride transmembrane transport);GO:0098869(cellular oxidant detoxification);GO:0060315(negative regulation of ryanodine-sensitive calcium-release channel activity);GO:0051099(positive regulation of binding);GO:0034765(regulation of ion transmembrane transport);GO:0034707(chloride channel complex);GO:0016020(membrane);GO:0010880(regulation of release of sequestered calcium ion into cy…	NA	NA	NA	chloride intracellular channel 2 [Source:NCBI gene;Acc:100516055]	0.929583	0.083966	0.269073	1.69313	2.52189	1.13575	0.239708	-2.06065	0.0212208	0.561505	down	yes
ENSSSCG00000030335		ENSSSCT00000065617	NA	NA	NA	NA	uncharacterized LOC102157705 [Source:NCBI gene;Acc:102157705]	0.0145602	0	0.218756	0.487985	1.76604	0.783515	0.0768108	-3.70255	0.0214284	0.561505	down	yes
ENSSSCG00000004713	TGM5	ENSSSCT00000005205	GO:0046872(metal ion binding);GO:0018149(peptide cross-linking);GO:0003810(protein-glutamine gamma-glutamyltransferase activity)	NA	NA	NA	transglutaminase 5 [Source:NCBI gene;Acc:100158178]	0.0302139	0	0	0.0600034	0.548506	0.498537	0.0272924	-5.19536	0.0224969	0.571408	down	yes
ENSSSCG00000016263		ENSSSCT00000050366;ENSSSCT00000050529;ENSSSCT00000063156;ENSSSCT00000059130	GO:0005634(nucleus);GO:0005634(nucleus)	05168(Herpes simplex infection);05203(Viral carcinogenesis);05203(Viral carcinogenesis)	NA	NA	nuclear body protein SP140-like protein [Source:NCBI gene;Acc:100517129]	0.0548879	0	0.043208	0.683654	0.203908	0.677765	0.062668	-3.99613	0.0226496	0.571408	down	yes
ENSSSCG00000004703		ENSSSCT00000038761;ENSSSCT00000041897;ENSSSCT00000037932	GO:0043209(myelin sheath);GO:0043066(negative regulation of apoptotic process);GO:0032091(negative regulation of protein binding);GO:0016772(transferase activity, transferring phosphorus-containing groups);GO:0016740(transferase activity);GO:0016310(phosphorylation);GO:0016301(kinase activity);GO:0005739(mitochondrion);GO:0005524(ATP binding);GO:0003824(catalytic activity);GO:0000166(nucleotide b…	00330(Arginine and proline metabolism);00330(Arginine and proline metabolism)	NA	NA	creatine kinase, mitochondrial 1A [Source:NCBI gene;Acc:100519994]	0.296084	0.544847	0.487026	4.39761	0.555756	0.590893	0.239519	-2.06179	0.022953	0.573422	down	yes
ENSSSCG00000013033	BAD	ENSSSCT00000014246;ENSSSCT00000063471	GO:2000078(positive regulation of type B pancreatic cell development);GO:1902220(positive regulation of intrinsic apoptotic signaling pathway in response to osmotic stress);GO:0097202(activation of cysteine-type endopeptidase activity);GO:0097193(intrinsic apoptotic signaling pathway);GO:0097192(extrinsic apoptotic signaling pathway in absence of ligand);GO:0097191(extrinsic apoptotic signaling p…	01521(EGFR tyrosine kinase inhibitor resistance);01522(Endocrine resistance);01524(Platinum drug resistance);04012(ErbB signaling pathway);04014(Ras signaling pathway);04022(cGMP - PKG signaling pathway);04024(cAMP signaling pathway);04140(Autophagy - animal);04151(PI3K-Akt signaling pathway);04210(Apoptosis);04370(VEGF signaling pathway);04510(Focal adhesion);04722(Neurotrophin signaling pathway…	K02158	NA	BCL2 associated agonist of cell death [Source:NCBI gene;Acc:100521065]	0.572734	1.82859	1.25968	18.522	0.694197	2.12077	0.17158	-2.54304	0.0231873	0.575673	down	yes
ENSSSCG00000015353	SCIN	ENSSSCT00000066126	GO:0051693(actin filament capping);GO:0051127(positive regulation of actin nucleation);GO:0051015(actin filament binding);GO:0051014(actin filament severing);GO:0045654(positive regulation of megakaryocyte differentiation);GO:0043065(positive regulation of apoptotic process);GO:0042989(sequestering of actin monomers);GO:0008285(negative regulation of cell proliferation);GO:0005903(brush border);G…	04666(Fc gamma R-mediated phagocytosis);04810(Regulation of actin cytoskeleton);05203(Viral carcinogenesis)	NA	NA	scinderin [Source:NCBI gene;Acc:100512981]	0.212742	0	0.161296	2.9104	0.172464	0.868972	0.0946493	-3.40126	0.0234715	0.57834	down	yes
ENSSSCG00000004046	PNLDC1	ENSSSCT00000004474	GO:0090503(RNA phosphodiester bond hydrolysis, exonucleolytic);GO:0005783(endoplasmic reticulum);GO:0005737(cytoplasm);GO:0004535(poly(A)-specific ribonuclease activity);GO:0003676(nucleic acid binding);GO:0001825(blastocyst formation);GO:0000289(nuclear-transcribed mRNA poly(A) tail shortening);GO:0000175(3'-5'-exoribonuclease activity)	03018(RNA degradation)	K01148	EC:3.1.13.4	PARN like, ribonuclease domain containing 1 [Source:NCBI gene;Acc:100152694]	0.498821	0	1.25794	0.956827	2.55163	13.0452	0.106125	-3.23616	0.0235194	0.57834	down	yes
ENSSSCG00000008976	ART3	ENSSSCT00000065192;ENSSSCT00000033261;ENSSSCT00000009831;ENSSSCT00000035052	GO:0018120(peptidyl-arginine ADP-ribosylation);GO:0016757(transferase activity, transferring glycosyl groups);GO:0016740(transferase activity);GO:0006471(protein ADP-ribosylation);GO:0003956(NAD(P)+-protein-arginine ADP-ribosyltransferase activity);GO:0003950(NAD+ ADP-ribosyltransferase activity);GO:0003950(NAD+ ADP-ribosyltransferase activity)	NA	NA	NA	ADP-ribosyltransferase 3 [Source:NCBI gene;Acc:100522086]	0	0	0.321768	0	7.18601	3.55804	0.0299484	-5.06138	0.024014	0.579938	down	yes
ENSSSCG00000011141	CALML5	ENSSSCT00000012193	GO:0051300(spindle pole body organization);GO:0019722(calcium-mediated signaling);GO:0005634(nucleus);GO:0005509(calcium ion binding)	04014(Ras signaling pathway);04015(Rap1 signaling pathway);04020(Calcium signaling pathway);04022(cGMP - PKG signaling pathway);04024(cAMP signaling pathway);04070(Phosphatidylinositol signaling system);04114(Oocyte meiosis);04218(Cellular senescence);04261(Adrenergic signaling in cardiomyocytes);04270(Vascular smooth muscle contraction);04371(Apelin signaling pathway);04713(Circadian entrainment…	K02183	NA	calmodulin like 5 [Source:NCBI gene;Acc:100738118]	2.14776	0.28446	3.16596	17.8284	2.79099	14.3866	0.159921	-2.64457	0.0241439	0.580575	down	yes
ENSSSCG00000004193	ENPP1	ENSSSCT00000042180	GO:0090305(nucleic acid phosphodiester bond hydrolysis);GO:0050427(3'-phosphoadenosine 5'-phosphosulfate metabolic process);GO:0047429(nucleoside-triphosphate diphosphatase activity);GO:0046872(metal ion binding);GO:0046627(negative regulation of insulin receptor signaling pathway);GO:0046325(negative regulation of glucose import);GO:0046034(ATP metabolic process);GO:0045719(negative regulation o…	00230(Purine metabolism);00240(Pyrimidine metabolism);00500(Starch and sucrose metabolism);00740(Riboflavin metabolism);00760(Nicotinate and nicotinamide metabolism);00770(Pantothenate and CoA biosynthesis)	NA	NA	ectonucleotide pyrophosphatase/phosphodiesterase 1 [Source:NCBI gene;Acc:100037271]	0.202118	0.0826023	0.00726381	0.224503	0.803435	0.805737	0.159235	-2.65077	0.0260576	0.603243	down	yes
ENSSSCG00000003439	DHRS3	ENSSSCT00000003817	GO:0060411(cardiac septum morphogenesis);GO:0060349(bone morphogenesis);GO:0060021(roof of mouth development);GO:0055114(oxidation-reduction process);GO:0048387(negative regulation of retinoic acid receptor signaling pathway);GO:0048385(regulation of retinoic acid receptor signaling pathway);GO:0042572(retinol metabolic process);GO:0030278(regulation of ossification);GO:0016021(integral component…	00830(Retinol metabolism)	K11146	EC:1.1.1.300	dehydrogenase/reductase 3 [Source:NCBI gene;Acc:100514967]	0.178206	0.124497	1.124	5.85484	0.305643	3.04541	0.154977	-2.68987	0.0268795	0.616135	down	yes
ENSSSCG00000038081	AGPAT3	ENSSSCT00000064452	GO:0042171(lysophosphatidic acid acyltransferase activity);GO:0016746(transferase activity, transferring acyl groups);GO:0016740(transferase activity);GO:0016021(integral component of membrane);GO:0016020(membrane);GO:0005783(endoplasmic reticulum)	00561(Glycerolipid metabolism);00564(Glycerophospholipid metabolism);04072(Phospholipase D signaling pathway)	NA	NA	1-acylglycerol-3-phosphate O-acyltransferase 3 [Source:NCBI gene;Acc:100233171]	0.185894	0.267626	0.0676962	1.13801	0.422086	0.729558	0.22764	-2.13517	0.0282038	0.632265	down	yes
ENSSSCG00000037401		ENSSSCT00000049274	NA	NA	NA	NA	melanoma-associated antigen B16-like [Source:NCBI gene;Acc:100522411]	0	0	0.050716	0	1.24505	1.75217	0.016921	-5.88504	0.0293091	0.640296	down	yes
ENSSSCG00000005316	TPM2	ENSSSCT00000005854;ENSSSCT00000056326;ENSSSCT00000058312	GO:0051015(actin filament binding);GO:0043462(regulation of ATPase activity);GO:0007015(actin filament organization);GO:0005884(actin filament);GO:0003779(actin binding);GO:0003779(actin binding)	04260(Cardiac muscle contraction);04261(Adrenergic signaling in cardiomyocytes);05410(Hypertrophic cardiomyopathy (HCM));05414(Dilated cardiomyopathy (DCM));05414(Dilated cardiomyopathy (DCM))	NA	NA	tropomyosin 2 [Source:NCBI gene;Acc:396693]	0.180238	0	0.320709	0.331516	3.53607	0.634938	0.111259	-3.168	0.030989	0.667094	down	yes
ENSSSCG00000031649	RNASE1	ENSSSCT00000053561;ENSSSCT00000039243	GO:0090501(RNA phosphodiester bond hydrolysis);GO:0090305(nucleic acid phosphodiester bond hydrolysis);GO:0016787(hydrolase activity);GO:0004540(ribonuclease activity);GO:0004519(endonuclease activity);GO:0004518(nuclease activity);GO:0003676(nucleic acid binding);GO:0003676(nucleic acid binding)	NA	NA	NA	ribonuclease A family member 1, pancreatic [Source:NCBI gene;Acc:100312980]	1.74639	1.30514	1.38691	6.95604	0.845113	12.4213	0.219481	-2.18783	0.0311643	0.668993	down	yes
ENSSSCG00000029783	MKX	ENSSSCT00000028322	GO:0043565(sequence-specific DNA binding);GO:0006355(regulation of transcription, DNA-templated);GO:0005634(nucleus);GO:0003677(DNA binding)	NA	NA	NA	mohawk homeobox [Source:NCBI gene;Acc:100620286]	0.055955	1.26951	1.06394	4.19835	4.71043	4.85647	0.173582	-2.52631	0.0337913	0.693508	down	yes
ENSSSCG00000029359	PHLDA3	ENSSSCT00000024538	GO:0080025(phosphatidylinositol-3,5-bisphosphate binding);GO:0051898(negative regulation of protein kinase B signaling);GO:0043325(phosphatidylinositol-3,4-bisphosphate binding);GO:0043065(positive regulation of apoptotic process);GO:0042771(intrinsic apoptotic signaling pathway in response to DNA damage by p53 class mediator);GO:0032266(phosphatidylinositol-3-phosphate binding);GO:0010314(phosph…	NA	NA	NA	pleckstrin homology like domain family A member 3 [Source:NCBI gene;Acc:100622793]	7.45618	3.67981	0.837914	7.98754	18.499	23.9537	0.237388	-2.07468	0.0338726	0.693508	down	yes
ENSSSCG00000028627		ENSSSCT00000025438;ENSSSCT00000024792	GO:0055114(oxidation-reduction process);GO:0046872(metal ion binding);GO:0043231(intracellular membrane-bounded organelle);GO:0042738(exogenous drug catabolic process);GO:0020037(heme binding);GO:0019373(epoxygenase P450 pathway);GO:0016712(oxidoreductase activity, acting on paired donors, with incorporation or reduction of molecular oxygen, reduced flavin or flavoprotein as one donor, and incorp…	NA	NA	NA	cytochrome P450 2G1 [Source:NCBI gene;Acc:100737508]	0.543587	0.2566	0.474523	1.17278	2.56202	1.51051	0.243019	-2.04086	0.0346055	0.703567	down	yes
ENSSSCG00000039573	SLPI	ENSSSCT00000049287	GO:0045087(innate immune response);GO:0045071(negative regulation of viral genome replication);GO:0035821(modification of morphology or physiology of other organism);GO:0032496(response to lipopolysaccharide);GO:0032091(negative regulation of protein binding);GO:0030414(peptidase inhibitor activity);GO:0019899(enzyme binding);GO:0019731(antibacterial humoral response);GO:0010951(negative regulati…	NA	NA	NA	secretory leukocyte peptidase inhibitor [Source:NCBI gene;Acc:396886]	1.04464	2.72448	0	1.34369	27.2149	1.46131	0.125554	-2.99362	0.0354126	0.708653	down	yes
ENSSSCG00000023592	TAC1	ENSSSCT00000027581;ENSSSCT00000048830;ENSSSCT00000037660	GO:1990090(cellular response to nerve growth factor stimulus);GO:0048265(response to pain);GO:0043025(neuronal cell body);GO:0031835(substance P receptor binding);GO:0030424(axon);GO:0019233(sensory perception of pain);GO:0007217(tachykinin receptor signaling pathway);GO:0007204(positive regulation of cytosolic calcium ion concentration);GO:0006954(inflammatory response);GO:0005623(cell);GO:00056…	04080(Neuroactive ligand-receptor interaction);04080(Neuroactive ligand-receptor interaction)	K05239	NA	tachykinin precursor 1 [Source:NCBI gene;Acc:100525179]	0.972497	0	0	3.77653	4.9663	1.11364	0.0986659	-3.3413	0.0358342	0.71306	down	yes
ENSSSCG00000039009		ENSSSCT00000056691;ENSSSCT00000058878;ENSSSCT00000048113	GO:0016021(integral component of membrane);GO:0016020(membrane);GO:0016020(membrane)	NA	NA	NA		0.232217	0.0238571	0.249241	1.26016	0.908685	2.7273	0.103207	-3.27639	0.0359658	0.714341	down	yes
ENSSSCG00000012192		ENSSSCT00000013337	NA	NA	NA	NA		0	0	0.0661516	0.589882	0.194572	0.760171	0.0428269	-4.54534	0.0362236	0.716782	down	yes
ENSSSCG00000037105	EVL	ENSSSCT00000045698	GO:1900028(negative regulation of ruffle assembly);GO:0071346(cellular response to interferon-gamma);GO:0051496(positive regulation of stress fiber assembly);GO:0051289(protein homotetramerization);GO:0045335(phagocytic vesicle);GO:0045010(actin nucleation);GO:0042995(cell projection);GO:0030838(positive regulation of actin filament polymerization);GO:0030027(lamellipodium);GO:0017124(SH3 domain …	NA	NA	NA	Enah/Vasp-like [Source:NCBI gene;Acc:100513162]	0.0175147	0.022074	0	0.15668	0.099941	0.250903	0.0780037	-3.68031	0.0382396	0.731281	down	yes
ENSSSCG00000031091	FAM237B	ENSSSCT00000063465	NA	NA	NA	NA	family with sequence similarity 237 member A [Source:NCBI gene;Acc:106504950]	0	0.140208	0.115881	0.893072	0.692842	0.926724	0.10192	-3.29449	0.0393024	0.731281	down	yes
ENSSSCG00000018031	ZNF287	ENSSSCT00000019626	GO:0046872(metal ion binding);GO:0045893(positive regulation of transcription, DNA-templated);GO:0042035(regulation of cytokine biosynthetic process);GO:0006355(regulation of transcription, DNA-templated);GO:0005634(nucleus);GO:0003700(DNA-binding transcription factor activity);GO:0003676(nucleic acid binding)	NA	NA	NA	zinc finger protein 287 [Source:NCBI gene;Acc:100524396]	0.403521	0.156669	0.021768	0.774293	0.657843	1.29263	0.213581	-2.22715	0.041488	0.741831	down	yes
ENSSSCG00000035104	TERB1	ENSSSCT00000059944	GO:0070197(meiotic attachment of telomere to nuclear envelope);GO:0070187(shelterin complex);GO:0045141(meiotic telomere clustering);GO:0007129(synapsis);GO:0005637(nuclear inner membrane);GO:0003677(DNA binding);GO:0000784(nuclear chromosome, telomeric region);GO:0000781(chromosome, telomeric region)	NA	NA	NA	telomere repeat binding bouquet formation protein 1 [Source:NCBI gene;Acc:110260937]	0.598936	0	1.50231	1.79873	5.061	6.1684	0.161285	-2.63231	0.0420151	0.747827	down	yes
ENSSSCG00000035147	NAGLU	ENSSSCT00000063959	GO:0070062(extracellular exosome);GO:0060119(inner ear receptor cell development);GO:0046548(retinal rod cell development);GO:0045475(locomotor rhythm);GO:0042474(middle ear morphogenesis);GO:0021680(cerebellar Purkinje cell layer development);GO:0007040(lysosome organization)	NA	NA	NA	N-acetyl-alpha-glucosaminidase [Source:HGNC Symbol;Acc:HGNC:7632]	0.480025	0	0.075459	1.96955	1.04893	0.565142	0.155006	-2.6896	0.0433861	0.753288	down	yes
ENSSSCG00000001045	ELOVL2	ENSSSCT00000057115;ENSSSCT00000056795;ENSSSCT00000051383	GO:0102756(very-long-chain 3-ketoacyl-CoA synthase activity);GO:0102338(3-oxo-lignoceronyl-CoA synthase activity);GO:0102337(3-oxo-cerotoyl-CoA synthase activity);GO:0102336(3-oxo-arachidoyl-CoA synthase activity);GO:0042761(very long-chain fatty acid biosynthetic process);GO:0034626(fatty acid elongation, polyunsaturated fatty acid);GO:0034625(fatty acid elongation, monounsaturated fatty acid);G…	00062(Fatty acid elongation);01040(Biosynthesis of unsaturated fatty acids);01212(Fatty acid metabolism);01212(Fatty acid metabolism)	NA	NA	ELOVL fatty acid elongase 2 [Source:NCBI gene;Acc:100153368]	0.0682111	0	0.0157693	0.18043	0.150166	0.599336	0.0903082	-3.469	0.0437397	0.753288	down	yes
ENSSSCG00000005130	ELAVL2	ENSSSCT00000047492	GO:0003723(RNA binding);GO:0003676(nucleic acid binding)	NA	NA	NA	ELAV like RNA binding protein 2 [Source:NCBI gene;Acc:100153303]	0	0	0.026273	0.18927	0.23555	0.0854578	0.0514876	-4.27963	0.043857	0.754085	down	yes
ENSSSCG00000040252		ENSSSCT00000059808	NA	NA	NA	NA		0.167226	0.797704	0	1.75856	2.17017	2.24431	0.156314	-2.67748	0.0443399	0.761156	down	yes
ENSSSCG00000030113	SHISA2	ENSSSCT00000028975	GO:0040037(negative regulation of fibroblast growth factor receptor signaling pathway);GO:0030178(negative regulation of Wnt signaling pathway);GO:0016021(integral component of membrane);GO:0016020(membrane);GO:0005783(endoplasmic reticulum)	NA	NA	NA	shisa family member 2 [Source:NCBI gene;Acc:100739731]	0	0	0.18282	0.819786	1.47513	0.521275	0.0649176	-3.94525	0.0447405	0.764329	down	yes
ENSSSCG00000013333	BDNF	ENSSSCT00000014561;ENSSSCT00000042207	GO:1900122(positive regulation of receptor binding);GO:0051965(positive regulation of synapse assembly);GO:0050804(modulation of chemical synaptic transmission);GO:0048812(neuron projection morphogenesis);GO:0048672(positive regulation of collateral sprouting);GO:0048668(collateral sprouting);GO:0048471(perinuclear region of cytoplasm);GO:0045664(regulation of neuron differentiation);GO:0043524(n…	04010(MAPK signaling pathway);04024(cAMP signaling pathway);04722(Neurotrophin signaling pathway);05016(Huntington's disease);05030(Cocaine addiction);05034(Alcoholism);05034(Alcoholism)	K04355	NA	brain derived neurotrophic factor [Source:NCBI gene;Acc:397495]	0.226344	0.255244	0	0.237561	0.620014	3.49572	0.110626	-3.17623	0.0451084	0.764529	down	yes
ENSSSCG00000029536	SCTR	ENSSSCT00000041146;ENSSSCT00000029583	GO:0017046(peptide hormone binding);GO:0016021(integral component of membrane);GO:0016020(membrane);GO:0015055(secretin receptor activity);GO:0008528(G protein-coupled peptide receptor activity);GO:0007420(brain development);GO:0007186(G protein-coupled receptor signaling pathway);GO:0007166(cell surface receptor signaling pathway);GO:0007165(signal transduction);GO:0005881(cytoplasmic microtubul…	04080(Neuroactive ligand-receptor interaction);04972(Pancreatic secretion);04976(Bile secretion);04976(Bile secretion)	K04588	NA	secretin receptor [Source:NCBI gene;Acc:100521045]	0.0758352	0	0.0357809	0.632749	0.156257	0.317276	0.100893	-3.3091	0.0460765	0.777158	down	yes
ENSSSCG00000015563	RGL1	ENSSSCT00000045759;ENSSSCT00000016953	GO:0008321(Ral guanyl-nucleotide exchange factor activity);GO:0007264(small GTPase mediated signal transduction);GO:0007165(signal transduction);GO:0005085(guanyl-nucleotide exchange factor activity);GO:0005085(guanyl-nucleotide exchange factor activity)	04014(Ras signaling pathway);04014(Ras signaling pathway)	K17635	NA	ral guanine nucleotide dissociation stimulator like 1 [Source:NCBI gene;Acc:100515847]	0.0897423	0.0330193	0.239136	0.692076	0.49966	0.630976	0.198549	-2.33243	0.0470855	0.78668	down	yes
ENSSSCG00000032301		ENSSSCT00000051485;ENSSSCT00000053796;ENSSSCT00000049660	NA	NA	NA	NA	major centromere autoantigen B-like [Source:NCBI gene;Acc:102162336]	0.160382	0	1.66639	0.717483	10.9788	2.51598	0.128535	-2.95977	0.0480121	0.78668	down	yes
ENSSSCG00000000584	SLCO1A2	ENSSSCT00000064167;ENSSSCT00000052563	GO:0055085(transmembrane transport);GO:0043252(sodium-independent organic anion transport);GO:0016021(integral component of membrane);GO:0016020(membrane);GO:0015721(bile acid and bile salt transport);GO:0015347(sodium-independent organic anion transmembrane transporter activity);GO:0015125(bile acid transmembrane transporter activity);GO:0006811(ion transport);GO:0005887(integral component of pl…	04976(Bile secretion);04976(Bile secretion)	NA	NA	solute carrier organic anion transporter family member 1A2 [Source:NCBI gene;Acc:397534]	0.0232588	0	0.198581	0.0281321	1.86792	0.462886	0.0940424	-3.41054	0.0487452	0.78668	down	yes
ENSSSCG00000040418	FSIP1	ENSSSCT00000058778	NA	NA	NA	NA	fibrous sheath interacting protein 1 [Source:NCBI gene;Acc:100737163]	0.084116	0	0.244992	0.503441	1.75623	0.889854	0.104494	-3.2585	0.0488499	0.78668	down	yes
ENSSSCG00000038958	DNM3	ENSSSCT00000054411;ENSSSCT00000063563	GO:0016185(synaptic vesicle budding from presynaptic endocytic zone membrane);GO:0005525(GTP binding);GO:0003924(GTPase activity);GO:0001917(photoreceptor inner segment);GO:0000166(nucleotide binding);GO:0000166(nucleotide binding)	04072(Phospholipase D signaling pathway);04144(Endocytosis);04721(Synaptic vesicle cycle);04961(Endocrine and other factor-regulated calcium reabsorption);05100(Bacterial invasion of epithelial cells);05100(Bacterial invasion of epithelial cells)	NA	NA	dynamin 3 [Source:NCBI gene;Acc:100622420]	0.0122892	0.0285313	0	0.0150147	0.183227	0.270813	0.0870272	-3.52239	0.0497616	0.79204	down	yes
